# Supplementary material
Source: PubMed Central journal article supplement (PMC3570587)
Supplement: NIHMS420466-supplement-439_2012_1249_MOESM1_ESM.pdf [file NIHMS420466-supplement-439_2012_1249_MOESM1_ESM.pdf]

Table S1. A list of 14 genes with mutations identified in patients with diaphragm defect

| <b>Gene Symbol</b> | <b>Entrez Gene ID</b> | <b>Nucleotide, Amino acid</b>                    | <b>PMID</b>           | <b>Phenotype</b>                                                                                                           | <b>Human Phenotype Citations</b>                                                                                                                                                                                                                                                                                                                       |
|--------------------|-----------------------|--------------------------------------------------|-----------------------|----------------------------------------------------------------------------------------------------------------------------|--------------------------------------------------------------------------------------------------------------------------------------------------------------------------------------------------------------------------------------------------------------------------------------------------------------------------------------------------------|
| <i>WT1</i>         | 7490                  | c.1097G > A,p.A366H                              | 16932893;<br>18203154 | Denys-Drash syndrome,<br>CDH                                                                                               | Cho HY et al. Hydrothorax in a patient with Denys-Drash syndrome associated with a diaphragmatic defect. <i>Pediatr Nephrol.</i> 2006 Dec;21(12):1909-12.; Antonius T et al. (2008) Denys-Drash syndrome and congenital diaphragmatic hernia: another case with the 1097G > A(Arg366His) mutation. <i>Am J Med Genet A.</i> 2008 Feb 15;146A(4):496-9. |
| <i>ZFPM2</i>       | 23414                 | p.D98N; c. 234C>T,<br>p.R112*                    | 21525063;<br>16103912 | isolated CDH; CDH with<br>respiratory failure                                                                              | Wat MJ et al. Genomic alterations that contribute to the development of isolated and non-isolated congenital diaphragmatic hernia. <i>J Med Genet.</i> 2011 May;48(5):299-307.; Ackerman KG et al. Fog2 Is Required for Normal Diaphragm and Lung Development in Mice and Humans. <i>PLoS Genet.</i> 2005 Jul;1(1):58-65.                              |
| <i>STRA6</i>       | 64220                 | p.G50AfsX22;P90L;<br>P293L;T321P;T644M<br>;R655C | 17273977              | CDH, anophthalmia,<br>congenital heart defects,<br>alveolar capillary dysplasia,<br>lung hypoplasia, mental<br>retardation | Pasutto F et al. Mutations in STRA6 cause a broad spectrum of malformations including anophthalmia, congenital heart defects, diaphragmatic hernia, alveolar capillary dysplasia, lung hypoplasia, and mental retardation. <i>Am J Hum Genet.</i> 2007 Mar;80(3):550-60.                                                                               |

|               |       |                                                                                 |                    |                                                                                                                             |                                                                                                                                                                                                                                                                                                                                                                                                 |
|---------------|-------|---------------------------------------------------------------------------------|--------------------|-----------------------------------------------------------------------------------------------------------------------------|-------------------------------------------------------------------------------------------------------------------------------------------------------------------------------------------------------------------------------------------------------------------------------------------------------------------------------------------------------------------------------------------------|
| <i>EFNB1</i>  | 1947  | c.432delG, p.L145WfsX14; c.151_153delGTG, p.V51del; c.c.712delG, p.V238TrpfsX21 | 16639408; 20734337 | CDH,craniofrontonasal syndrome                                                                                              | Vasudevan PC et al. Expanding the phenotype of craniofrontonasal syndrome: two unrelated boys with <i>EFNB1</i> mutations and congenital diaphragmatic hernia. <i>Eur J Hum Genet.</i> 2006 Jul;14(7):884-7.; Hoque J et al. A novel <i>EFNB1</i> mutation (c.712delG) in a family with craniofrontonasal syndrome and diaphragmatic hernia. <i>Am J Med Genet A.</i> 2010 Oct;152A(10):2574-7. |
| <i>HLX</i>    | 3142  | c.35C>T,p.S12F; c.53C>T,p.S18L; c.517G>T,p.D173Y; c.704C>T,p.A235V              | 19459883           | Isolated CDH                                                                                                                | Slavotinek AM et al. Sequence variants in the <i>HLX</i> gene at chromosome 1q41-1q42 in patients with diaphragmatic hernia                                                                                                                                                                                                                                                                     |
| <i>DISP1</i>  | 84976 | c.4412C>G, p.A1471G                                                             | 20799323           | ventricular septal defect,abnormal aorta), left-sided Bochdalek CDH, and a left-sided cleft lip with bilateral cleft palate | Kantarci S et al. Characterization of the chromosome 1q41q42.12 region, and the candidate gene <i>DISP1</i> , in patients with CDH. <i>Am J Med Genet A.</i> 2010 Oct;152A(10):2493-504.                                                                                                                                                                                                        |
| <i>NIPBL</i>  | 25836 | c.5524C>T, p.R1841*                                                             | 20156239           | Brachmann-de Lange syndrc                                                                                                   | Hosokawa S et al. Brachmann-de Lange syndrome with congenital diaphragmatic hernia and <i>NIPBL</i> gene mutation. <i>Congenit Anom (Kyoto).</i> 2010 Jun;50(2):129-32.                                                                                                                                                                                                                         |
| <i>PDGFRA</i> | 5156  | c.C2889G,p.L967V                                                                | 17568391           | non-isolated CDH                                                                                                            | Bleyl SB et al. Candidate genes for congenital diaphragmatic hernia from animal models: sequencing of <i>FOG2</i> and <i>PDGFR</i> alpha reveals rare variants in diaphragmatic hernia patients. <i>Eur J Hum Genet.</i> 2007 Sep;15(9):950-8.                                                                                                                                                  |

|               |       |                        |          |                              |                                                                                                                                                                                                                                                            |
|---------------|-------|------------------------|----------|------------------------------|------------------------------------------------------------------------------------------------------------------------------------------------------------------------------------------------------------------------------------------------------------|
| <i>CHD2</i>   | 1106  | c.C5128T,p.R1710W      | 16736036 | CDH                          | Slavotinek AM et al. Array comparative genomic hybridization in patients with congenital diaphragmatic hernia: mapping of four CDH-critical regions and sequencing of candidate genes at 15q26.1-15q26.2. <i>Eur J Hum Genet.</i> 2006 Sep;14(9):999-1008. |
| <i>NR2F2</i>  | 7026  | c.G733T,p.L245F        | 16736036 | CDH/15q                      | Slavotinek AM et al. Array comparative genomic hybridization in patients with congenital diaphragmatic hernia: mapping of four CDH-critical regions and sequencing of candidate genes at 15q26.1-15q26.2. <i>Eur J Hum Genet.</i> 2006 Sep;14(9):999-1008. |
| <i>ARRDC4</i> | 91947 | c.C1171T,p.R391W       | 16736036 | CDH                          | Slavotinek AM et al. Array comparative genomic hybridization in patients with congenital diaphragmatic hernia: mapping of four CDH-critical regions and sequencing of candidate genes at 15q26.1-15q26.2. <i>Eur J Hum Genet.</i> 2006 Sep;14(9):999-1008. |
| <i>LRP2</i>   | 4036  | c.8516_8519delTTTA,p.' | 17632512 | Donnai-Barrow syndrome,      | Kantarci S et al. Mutations in LRP2, which encodes the multiligand receptor megalin, cause Donnai-Barrow and facio-oculo-acoustico-renal syndromes. <i>Nat Genet.</i> 2007 Aug;39(8):957-9.                                                                |
| <i>FBN1</i>   | 2200  | c.T3277C, p.F1093L     | 12413333 | Marfan Syndrome; MFS         | Jacobs AM et al. A Recurring FBN1 Gene Mutation in Neonatal Marfan Syndrome. <i>Arch Pediatr Adolesc Med.</i> 2002 Nov;156(11):1081-5.                                                                                                                     |
| <i>EFEMP2</i> | 30008 | c.169G-->A, p.E57K     | 16685658 | Cutis laxa, autosomal recess | Huchtagowder V, et al (2006) Fibulin-4: A Novel Gene for an Autosomal Recessive Cutis Laxa Syndrome. <i>Am J Hum Genet</i> 78(6): 1075–1080.                                                                                                               |

---
