# Supplementary material
Source: PubMed Central journal article supplement (PMC3570587)
Supplement: NIHMS420466-supplement-439_2012_1249_MOESM2_ESM.pdf [file NIHMS420466-supplement-439_2012_1249_MOESM2_ESM.pdf]

**Table S2. Amino acid substitution impact predictions for 71 functional SNVs in CDH proband**

| CHROMO<br>SOME | POSITION        | Novel       | 1k            |                       |                       |                    | RE<br>F         | Type       | Substitu<br>ALT tion | Gene<br>Symbol | Gene ID     | PhastCo  |             |      |
|----------------|-----------------|-------------|---------------|-----------------------|-----------------------|--------------------|-----------------|------------|----------------------|----------------|-------------|----------|-------------|------|
|                |                 |             | e Freq<br>(%) | EvsEur<br>Freq<br>(%) | EvsAfr<br>Freq<br>(%) | EvsF<br>req<br>(%) |                 |            |                      |                |             | ns       | GERP        |      |
| <b>8</b>       | <b>11606565</b> | <b>TRUE</b> | .             | .                     | .                     | .                  | <b>missense</b> | <b>C T</b> | <b>R252W</b>         | <b>GATA4</b>   | <b>2626</b> | <b>1</b> | <b>4.71</b> |      |
| 3              | 53133472        | rs143232904 | .             | 0.09                  | 0.06                  | 0                  | 0.04            | missense   | T C                  | Y339C          | RFT1        | 91869    | 0.822       | 5.34 |
| 16             | 10631899        | TRUE        | .             | .                     | .                     | .                  | .               | missense   | T C                  | M68V           | EMP2        | 2013     | 0.999       | 5.26 |
| 7              | 107626530       | TRUE        | .             | .                     | .                     | .                  | .               | missense   | C T                  | V205M          | LAMB1       | 3912     | 1           | 5.2  |
| 17             | 36498966        | TRUE        | .             | .                     | .                     | .                  | .               | missense   | C T                  | C236Y          | GPR179      | 440435   | 1           | 5.09 |
| 17             | 45916053        | TRUE        | .             | .                     | .                     | .                  | .               | missense   | G A                  | T261M          | SCRN2       | 90507    | 0.836       | 5.08 |
| 6              | 158454575       | TRUE        | .             | .                     | 0.03                  | 0                  | 0.02            | missense   | C T                  | R192C          | SYNJ2       | 8871     | 1           | 4.83 |
| 4              | 86491702        | rs150698221 | .             | .                     | 0.09                  | 0                  | 0.06            | missense   | A G                  | E148G          | ARHGAP24    | 83478    | 0.999       | 5.46 |
| 20             | 18471068        | rs140409239 | .             | 0.05                  | 0.07                  | 0.03               | 0.06            | missense   | T G                  | D102A          | RBBP9       | 10741    | 1           | 4.83 |
| 18             | 70417487        | TRUE        | .             | .                     | .                     | .                  | .               | missense   | C T                  | D451N          | NETO1       | 81832    | 1           | 5.2  |
| 6              | 7583947         | TRUE        | .             | .                     | 0.01                  | 0                  | 0.01            | missense   | G A                  | R2151Q         | DSP         | 1834     | 0.969       | 5.2  |
| 1              | 34102110        | TRUE        | .             | .                     | 0.03                  | 0                  | 0.02            | missense   | C T                  | G1567S         | CSMD2       | 114784   | 0.919       | 4.36 |
| 1              | 94027838        | TRUE        | .             | .                     | .                     | .                  | .               | missense   | C T                  | R722H          | BCAR3       | 8412     | 0.936       | 5.2  |
| 14             | 94100957        | rs149171722 | .             | .                     | 0.04                  | 0                  | 0.03            | missense   | C T                  | P1936L         | UNC79       | 57578    | 1           | 5.45 |
| 3              | 121354608       | TRUE        | .             | .                     | .                     | .                  | .               | missense   | T A                  | Y222F          | HCLS1       | 3059     | 1           | 4.71 |
| 22             | 40807902        | TRUE        | .             | 0.05                  | .                     | .                  | .               | missense   | G A                  | A763V          | MKL1        | 57591    | 1           | 4.45 |
| 13             | 26128056        | TRUE        | .             | .                     | .                     | .                  | .               | missense   | T G                  | W355G          | ATP8A2      | 51761    | 1           | 3.73 |
| 1              | 8930519         | rs146619828 | .             | .                     | 0.03                  | 0                  | 0.02            | missense   | C A                  | V78F           | ENO1        | 2023     | 1           | 3.28 |
| 16             | 72832031        | rs144091993 | .             | .                     | 0.03                  | 0.03               | 0.03            | missense   | G A                  | S1517L         | ZFHX3       | 463      | 0.982       | 5.73 |
| 7              | 44153427        | TRUE        | .             | .                     | 0.07                  | 0                  | 0.05            | missense   | A T                  | Q1015L         | AEBP1       | 165      | 0.997       | 4.98 |
| 7              | 150761676       | TRUE        | .             | .                     | .                     | .                  | .               | missense   | G A                  | R94H           | SLC4A2      | 6522     | 0.993       | 3.8  |
| 15             | 26107955        | TRUE        | .             | .                     | .                     | .                  | .               | missense   | G A                  | L97F           | ATP10A      | 57194    | 1           | 2.56 |
| 5              | 1463817         | TRUE        | .             | .                     | .                     | .                  | .               | missense   | G C                  | S518R          | LPCAT1      | 79888    | 0.996       | 3.88 |
| 1              | 155891258       | TRUE        | .             | .                     | 0.01                  | 0                  | 0.01            | missense   | G A                  | P392S          | KIAA0907    | 22889    | 1           | 5.12 |
| 14             | 39650922        | TRUE        | .             | .                     | .                     | .                  | .               | missense   | G A                  | G670D          | PNN         | 5411     | 1           | 4.69 |
| 16             | 85688002        | TRUE        | .             | .                     | .                     | .                  | .               | missense   | C T                  | P182L          | KIAA0182    | 23199    | 1           | 4.62 |
| 17             | 7749463         | rs145085233 | .             | .                     | 0.01                  | 0                  | 0.01            | missense   | C T                  | R102W          | KDM6B       | 23135    | 1           | 3.69 |
| 19             | 45556432        | TRUE        | .             | .                     | 0.01                  | 0                  | 0.01            | missense   | G A                  | G64S           | CLASRP      | 11129    | 0.951       | 3.95 |
| 20             | 13850792        | TRUE        | .             | .                     | .                     | .                  | .               | missense   | G A                  | P388S          | SEL1L2      | 80343    | 1           | 2.84 |
| 2              | 149247339       | rs142293829 | .             | .                     | 0                     | 0.05               | 0.02            | missense   | C T                  | R1147W         | MBD5        | 55777    | 0.997       | 2.71 |
| 19             | 59022697        | rs148336155 | .             | .                     | 0.07                  | 0.03               | 0.06            | missense   | C T                  | R209Q          | SLC27A5     | 10998    | 0.003       | 2.31 |
| 14             | 31358935        | rs149072811 | .             | .                     | 0.04                  | 0                  | 0.03            | missense   | G C                  | E531Q          | COCH        | 1690     | 1           | 4.74 |
| 1              | 32674932        | TRUE        | .             | .                     | .                     | .                  | .               | missense   | G A                  | A80T           | DCDC2B      | 149069   | 1           | 5.02 |
| 1              | 161029482       | TRUE        | .             | .                     | .                     | .                  | .               | missense   | G A                  | A41V           | ARHGAP30    | 257106   | 0.997       | 4.96 |

|    |           |             |      |      |      |      |          |   |   |        |          |        |       |        |
|----|-----------|-------------|------|------|------|------|----------|---|---|--------|----------|--------|-------|--------|
| 17 | 80136979  | TRUE        | .    | 0.07 | 0.03 | 0.06 | missense | C | T | R433H  | CCDC57   | 284001 | 1     | 5.17   |
| 5  | 64875331  | rs142815878 | .    | 0.01 | 0    | 0.01 | missense | G | A | R384H  | PPWD1    | 23398  | 1     | 3.24   |
| 8  | 132052136 | TRUE        | .    | .    | .    | .    | missense | G | C | S148R  | ADCY8    | 114    | 1     | 2.57   |
| 16 | 3340477   | TRUE        | .    | .    | .    | .    | missense | A | C | R657S  | ZNF263   | 10127  | 1     | 1.97   |
| 11 | 17617669  | TRUE        | .    | .    | .    | .    | missense | C | T | L192F  | OTOG     | 340990 | 1     | 4.98   |
| 1  | 6605111   | TRUE        | .    | .    | .    | .    | missense | A | G | S292P  | NOL9     | 79707  | 0.025 | 3.62   |
| 11 | 63141435  | rs139591412 | .    | 0.03 | 0    | 0.02 | missense | C | T | A244V  | SLC22A9  | 114571 | 0.008 | 2.9    |
| 19 | 10970611  | TRUE        | .    | 0.04 | 0    | 0.03 | missense | C | T | A161V  | C19orf38 | 255809 | 1     | 3.73   |
| 17 | 27030715  | TRUE        | .    | .    | .    | .    | missense | C | T | S291N  | PROCA1   | 147011 | 0.993 | 2.83   |
| 5  | 140516502 | rs143201420 | .    | 0.01 | 0.03 | 0.02 | missense | C | T | H496Y  | PCDHB5   | 26167  | 0.034 | 0.656  |
| 3  | 130381153 | TRUE        | .    | 0.08 | 0    | 0.05 | splice-5 | G | A |        | COL6A6   | 131873 | 1     | 5.61   |
| 4  | 165961726 | TRUE        | .    | .    | .    | .    | missense | A | G | K168E  | TRIM60   | 166655 | 0.002 | 2.06   |
| 6  | 33169111  | TRUE        | .    | .    | .    | .    | missense | G | C | G30A   | SLC39A7  | 7922   | 1     | 1.39   |
| 14 | 21215891  | TRUE        | .    | .    | .    | .    | missense | A | G | D51G   | EDDM3A   | 10876  | 0.11  | 2.19   |
| 3  | 14693365  | TRUE        | .    | .    | .    | .    | missense | T | A | L8M    | C3orf19  | 51244  | 0.997 | 0.337  |
| 4  | 185578475 | TRUE        | .    | .    | .    | .    | splice-5 | G | T |        | CCDC111  | 201973 | 1     | 5.56   |
| 17 | 18054449  | TRUE        | .    | .    | .    | .    | missense | C | T | P2500L | MYO15A   | 51168  | 0.086 | 0.494  |
| 10 | 51769408  | TRUE        | .    | .    | .    | .    | missense | G | C | S508T  | AGAP6    | 414189 | 0.039 | 0.046  |
| 11 | 1088711   | TRUE        | .    | 0.03 | 0.03 | 0.03 | missense | C | T | R1166W | MUC2     | 4583   | 0.821 | -1.61  |
| 2  | 71036207  | rs189899717 | 0.05 | .    | .    | .    | utr-3    | A | C |        | CLEC4F   | 165530 | 0.996 | 3.56   |
| 14 | 38064189  | TRUE        | .    | 0.01 | 0    | 0.01 | utr-5    | C | G |        | FOXA1    | 3169   | 0.952 | 3.03   |
| 19 | 7505268   | TRUE        | .    | .    | .    | .    | missense | G | T | D148Y  | ARHGEF18 | 23370  | 0.516 | 0.532  |
| 1  | 156563879 | TRUE        | .    | .    | .    | .    | utr-3    | G | T |        | APOA1BP  | 128240 | 0.867 | 2.17   |
| 17 | 45507298  | TRUE        | .    | .    | .    | .    | missense | C | T | T870I  | C17orf57 | 124989 | 0.001 | -0.925 |
| 6  | 150390181 | TRUE        | .    | .    | .    | .    | missense | C | T | A8T    | ULBP3    | 79465  | 0     | -0.889 |
| 17 | 26988896  | TRUE        | .    | 0.01 | 0    | 0.01 | utr-5    | C | T |        | SDF2     | 6388   | 0.831 | 1.71   |
| 1  | 11167534  | TRUE        | .    | .    | .    | .    | utr-3    | G | T |        | MTOR     | 2475   | 0.011 | 2.03   |
| 6  | 55638913  | TRUE        | .    | .    | .    | .    | nonsense | G | A | R321*  | BMP5     | 653    | 0.967 | -2.11  |
| 4  | 10076973  | TRUE        | .    | .    | .    | .    | utr-3    | G | A |        | WDR1     | 9948   | 0.001 | 0.896  |
| 11 | 73078831  | TRUE        | .    | .    | .    | .    | utr-3    | T | G |        | ARHGEF17 | 9828   | 0.72  | N/A    |
| 11 | 77589989  | TRUE        | .    | .    | .    | .    | utr-3    | T | G |        | INTS4    | 92105  | 0.004 | N/A    |
| 14 | 70177718  | TRUE        | .    | .    | .    | .    | utr-3    | C | G |        | KIAA0247 | 9766   | 0     | -1.35  |
| 19 | 48806950  | TRUE        | .    | .    | .    | .    | missense | C | A | M278I  | CCDC114  | 93233  | 0.883 | -4.87  |
| 19 | 622835    | TRUE        | .    | 0.03 | 0    | 0.02 | missense | G | A | R481W  | POLRMT   | 5442   | 0     | -8.13  |
| 19 | 37382373  | TRUE        | .    | .    | .    | .    | utr-3    | A | G |        | ZNF829   | 374899 | 0.012 | -5.89  |
| 14 | 23845092  | TRUE        | 0.05 | 0.07 | 0.08 | 0.07 | utr-3    | G | A |        | IL25     | 64806  | 0     | -7.37  |
| 10 | 7604991   | TRUE        | .    | .    | .    | .    | utr-3    | C | T |        | ITIH5    | 80760  | 0     | -8.64  |

| Gene Symbol  | SIFT Prediction        | SIFT score | 1-SIFT score | polyphen n2 predictio | polyphen 2 score | PhyloP         | LRT             | Mutation taster score | Pmut           | Pmut Score    |
|--------------|------------------------|------------|--------------|-----------------------|------------------|----------------|-----------------|-----------------------|----------------|---------------|
| <b>GATA4</b> | <b>DAMAGING</b>        | <b>0</b>   | <b>1</b>     | <b>probably c</b>     | <b>1</b>         | <b>0.98469</b> | <b>0.999999</b> | <b>1</b>              | <b>PATHOLO</b> | <b>0.9807</b> |
| RFT1         | DAMAGING               | 0.01       | 0.99         | probably c            | 0.996            | 0.998059       | 1               | 0.999979              | PATHOLO        | 0.7301        |
| EMP2         | DAMAGING               | 0.05       | 0.95         | probably c            | 0.983            | 0.998727       | 1               | 0.995712              | NEUTRAL        | 0.4309        |
| LAMB1        | DAMAGING               | 0          | 1            | probably c            | 0.996            | 0.99882        | 1               | 0.997055              | NEUTRAL        | 0.2023        |
| GPR179       | DAMAGING               | 0          | 1            | probably c            | 0.992            | 0.999245       | 1               | 0.996803              | PATHOLO        | 0.5528        |
| SCRN2        | DAMAGING               | 0          | 1            | probably c            | 0.988            | 0.999531       | 1               | 0.999859              | PATHOLO        | 0.7146        |
| SYNJ2        | DAMAGING               | 0.04       | 0.96         | probably c            | 0.93             | 0.999002       | 0.999996        | 0.907342              | PATHOLO        | 0.9003        |
| ARHGAP24     | DAMAGING               | 0          | 1            | possibly d            | 0.753            | 0.99896        | 0.999802        | 0.860085              | PATHOLO        | 0.7013        |
| RBBP9        | TOLERATED              | 0.45       | 0.55         | probably c            | 0.982            | 0.998099       | 0.999987        | 0.933046              | PATHOLO        | 0.7947        |
| NETO1        | DAMAGING *Warning! Low | 0.05       | 0.95         | possibly d            | 0.857            | 0.998803       | 0.999858        | 0.574597              | NEUTRAL        | 0.1411        |
| DSP          | TOLERATED              | 0.34       | 0.66         | probably c            | 0.924            | 0.999601       | 0.999991        | 0.619088              | PATHOLO        | 0.8291        |
| CSMD2        | DAMAGING               | 0.05       | 0.95         | probably c            | 0.999            | 0.984655       | 1               | 0.999998              | NEUTRAL        | 0.4574        |
| BCAR3        | TOLERATED              | 0.64       | 0.36         | probably c            | 0.993            | 0.998828       | 1               | 0.999962              | PATHOLO        | 0.8586        |
| UNC79        | DAMAGING               | 0.01       | 0.99         | possibly d            | 0.896            | 0.999094       | 1               | 0.264198              | PATHOLO        | 0.8656        |
| HCLS1        | TOLERATED              | 0.63       | 0.37         | probably c            | 0.938            | 0.997867       | 1               | 0.987971              | NEUTRAL        | 0.1445        |
| MKL1         | TOLERATED              | 0.47       | 0.53         | probably c            | 0.917            | 0.998906       | 0.99531         | 0.610796              | PATHOLO        | 0.6737        |
| ATP8A2       | TOLERATED              | 0.33       | 0.67         | probably c            | 0.995            | 0.972837       | 1               | 0.997509              | NEUTRAL        | 0.1449        |
| ENO1         | DAMAGING *Warning! Low | 0          | 1            | benign                | 0.008            | 0.922022       | 0.991881        | 0.984522              | PATHOLO        | 0.6942        |
| ZFHX3        | TOLERATED              | 0.81       | 0.19         | possibly d            | 0.667            | 0.9998         | 0.999652        | 0.900437              | NEUTRAL        | 0.4605        |
| AEBP1        | DAMAGING               | 0.01       | 0.99         | benign                | 0.037            | 0.99829        | 0.993539        | 0.631769              | PATHOLO        | 0.9357        |
| SLC4A2       | DAMAGING               | 0.02       | 0.98         | possibly d            | 0.52             | 0.999376       | 0.999883        | 0.21017               | PATHOLO        | 0.523         |
| ATP10A       | DAMAGING               | 0.02       | 0.98         | probably c            | 0.998            | 0.998317       | 0.99993         | 0.959022              | NEUTRAL        | 0.1093        |
| LPCAT1       | DAMAGING               | 0          | 1            | possibly d            | 0.716            | 0.997683       | 1               | 0.996644              | PATHOLO        | 0.5004        |
| KIAA0907     | TOLERATED              | 0.17       | 0.83         | possibly d            | 0.714            | 0.99956        | 0.999996        | 0.000017              | NEUTRAL        | 0.4696        |
| PNN          | DAMAGING               | 0.03       | 0.97         | unknown               | N/A              | 0.999814       | 1               | 0.973905              | PATHOLO        | 0.9037        |
| KIAA0182     | DAMAGING               | 0.02       | 0.98         | unknown               | N/A              | 0.997782       | 0.999869        | 0.657402              | NEUTRAL        | 0.4401        |
| KDM6B        | DAMAGING               | 0          | 1            | benign                | 0.215            | 0.998112       | 0.991663        | 0.745727              | PATHOLO        | 0.8039        |
| CLASRP       | TOLERATED              | 0.22       | 0.78         | possibly d            | 0.828            | 0.998965       | 0.998833        | 0.970601              | NEUTRAL        | 0.1463        |
| SEL1L2       | TOLERATED              | 0.19       | 0.81         | probably c            | 0.996            | 0.899545       | 0.995137        | 0.914864              | NEUTRAL        | 0.0973        |
| MBD5         | DAMAGING *Warning! Low | 0          | 1            | possibly d            | 0.827            | 0.985843       | 0.999974        | 0.038666              | PATHOLO        | 0.9945        |
| SLC27A5      | DAMAGING               | 0          | 1            | probably c            | 0.994            | 0.968813       | 0.999484        | 0.994634              | NEUTRAL        | 0.4599        |
| COCH         | TOLERATED              | 0.63       | 0.37         | possibly d            | 0.635            | 0.999277       | 0.998829        | 0.953052              | NEUTRAL        | 0.0893        |
| DCDC2B       | TOLERATED              | 0.07       | 0.93         | probably c            | 0.992            | N/A            | N/A             | N/A                   | NEUTRAL        | 0.2479        |
| ARHGAP30     | TOLERATED              | 0.12       | 0.88         | possibly d            | 0.651            | 0.99945        | 0.999764        | 0.199658              | NEUTRAL        | 0.2388        |



| Gene Symbol  | Mutation accessor<br>Functiona l impact | Mutation accessor<br>score | Global Score     | Endeavou<br>r Rank | ToppGen<br>e Rank | Total<br>Rank |
|--------------|-----------------------------------------|----------------------------|------------------|--------------------|-------------------|---------------|
| <b>GATA4</b> | <b>high</b>                             | <b>3.85</b>                | <b>1.6525389</b> | 3                  | 1                 | <b>4</b>      |
| RFT1         | high                                    | 3.595                      | 1.6464138        | 60                 | 100               | <b>160</b>    |
| EMP2         | medium                                  | 3.105                      | 1.5688839        | 76                 | 27                | <b>103</b>    |
| LAMB1        | medium                                  | 2.96                       | 1.5352175        | 1                  | 2                 | <b>3</b>      |
| GPR179       | medium                                  | 2.72                       | 1.5346848        | 84                 | 11                | <b>95</b>     |
| SCRN2        | medium                                  | 2.69                       | 1.538209         | 71                 | 44                | <b>115</b>    |
| SYNJ2        | medium                                  | 2.395                      | 1.486664         | 42                 | 66                | <b>108</b>    |
| ARHGAP24     | medium                                  | 1.935                      | 1.4583647        | 50                 | 51                | <b>101</b>    |
| RBBP9        | medium                                  | 2.695                      | 1.4548832        | 87                 | 68                | <b>155</b>    |
| NETO1        | medium                                  | 2.125                      | 1.3749858        | 40                 | 54                | <b>94</b>     |
| DSP          | low                                     | 1.685                      | 1.367778         | 28                 | 39                | <b>67</b>     |
| CSMD2        | medium                                  | 1.985                      | 1.3629553        | 25                 | 47                | <b>72</b>     |
| BCAR3        | low                                     | 1.585                      | 1.360789         | 66                 | 106               | <b>172</b>    |
| UNC79        | low                                     | 0.975                      | 1.3382892        | 59                 | 55                | <b>114</b>    |
| HCLS1        | medium                                  | 2.275                      | 1.3077338        | 12                 | 18                | <b>30</b>     |
| MKL1         | medium                                  | 2.095                      | 1.2994212        | 49                 | 73                | <b>122</b>    |
| ATP8A2       | medium                                  | 2.49                       | 1.2832746        | 74                 | 74                | <b>148</b>    |
| ENO1         | medium                                  | 3.375                      | 1.2759625        | 16                 | 13                | <b>29</b>     |
| ZFHX3        | low                                     | 1.15                       | 1.2507889        | 8                  | 14                | <b>22</b>     |
| AEBP1        | low                                     | 1.265                      | 1.2341798        | 11                 | 7                 | <b>18</b>     |
| SLC4A2       | medium                                  | 2.36                       | 1.2135429        | 22                 | 76                | <b>98</b>     |
| ATP10A       | medium                                  | 2.51                       | 1.2103569        | 101                | 17                | <b>118</b>    |
| LPCAT1       | low                                     | 1.1                        | 1.2044727        | 52                 | 31                | <b>83</b>     |
| KIAA0907     | low                                     | 1.1                        | 1.2005173        | 21                 | 61                | <b>82</b>     |
| PNN          | low                                     | 0.895                      | 1.1917419        | 20                 | 42                | <b>62</b>     |
| KIAA0182     | low                                     | 1.67                       | 1.1855153        | 61                 | 84                | <b>145</b>    |
| KDM6B        | low                                     | 1.7                        | 1.1751902        | 19                 | 26                | <b>45</b>     |
| CLASRP       | low                                     | 1.18                       | 1.1607699        | 7                  | 85                | <b>92</b>     |
| SEL1L2       | medium                                  | 2.015                      | 1.1470846        | 99                 | 38                | <b>137</b>    |
| MBD5         | medium                                  | 1.995                      | 1.1461483        | 64                 | 95                | <b>159</b>    |
| SLC27A5      | medium                                  | 2.655                      | 1.1381831        | 97                 | 98                | <b>195</b>    |
| COCH         | low                                     | 0.99                       | 1.1277958        | 44                 | 50                | <b>94</b>     |
| DCDC2B       | low                                     | 1.83                       | 1.09809          | 88                 | 29                | <b>117</b>    |
| ARHGAP30     | neutral                                 | 0.22                       | 1.0911172        | 47                 | 64                | <b>111</b>    |

|                 |         |        |                   |     |                |
|-----------------|---------|--------|-------------------|-----|----------------|
| <i>CCDC57</i>   | low     | 0.975  | <b>1.06421</b>    | 102 | 35 <b>137</b>  |
| <i>PPWD1</i>    | low     | 1.445  | <b>1.0455969</b>  | 35  | 78 <b>113</b>  |
| <i>ADCY8</i>    | medium  | 2.015  | <b>1.0018891</b>  | 92  | 9 <b>101</b>   |
| <i>ZNF263</i>   | medium  | 2.515  | <b>0.9850952</b>  | 4   | 87 <b>91</b>   |
| <i>OTOG</i>     | low     | 1.685  | <b>0.9415</b>     | 77  | 33 <b>110</b>  |
| <i>NOL9</i>     | low     | 0.805  | <b>0.9215066</b>  | 78  | 71 <b>149</b>  |
| <i>SLC22A9</i>  | low     | 1.79   | <b>0.9052855</b>  | 69  | 56 <b>125</b>  |
| <i>C19orf38</i> | low     | 0.805  | <b>0.90353</b>    |     | 36 <b>36</b>   |
| <i>PROCA1</i>   | low     | 0.975  | <b>0.8680747</b>  | 105 | 53 <b>158</b>  |
| <i>PCDHB5</i>   | medium  | 3.18   | <b>0.8395561</b>  | 62  | 89 <b>151</b>  |
| <i>COL6A6</i>   | low     | 0.895  | <b>0.7505</b>     | 81  | 22 <b>103</b>  |
| <i>TRIM60</i>   | low     | 1.025  | <b>0.7410254</b>  | 103 | 49 <b>152</b>  |
| <i>SLC39A7</i>  | low     | 1.1    | <b>0.7199409</b>  | 95  | 101 <b>196</b> |
| <i>EDDM3A</i>   | neutral | 0.695  | <b>0.7085502</b>  | 98  | 59 <b>157</b>  |
| <i>C3orf19</i>  | low     | 1.87   | <b>0.6836076</b>  | 70  | 37 <b>107</b>  |
| <i>CCDC111</i>  | N/A     | N/A    | <b>0.656</b>      | 41  | 45 <b>86</b>   |
| <i>MYO15A</i>   | low     | 0.895  | <b>0.6204742</b>  | 37  | 46 <b>83</b>   |
| <i>AGAP6</i>    | medium  | 2.75   | <b>0.52498</b>    | 86  | 32 <b>118</b>  |
| <i>MUC2</i>     | low     | 1.59   | <b>0.4742</b>     | 39  | 97 <b>136</b>  |
| <i>CLEC4F</i>   | N/A     | N/A    | <b>0.4556</b>     | 24  | 58 <b>82</b>   |
| <i>FOXA1</i>    | N/A     | N/A    | <b>0.3982</b>     | 9   | 5 <b>14</b>    |
| <i>ARHGEF18</i> | neutral | 0.695  | <b>0.39086</b>    | 46  | 93 <b>139</b>  |
| <i>APOA1BP</i>  | N/A     | N/A    | <b>0.3037</b>     | 93  | 69 <b>162</b>  |
| <i>C17orf57</i> | neutral | 0.55   | <b>0.2792368</b>  | 75  | 40 <b>115</b>  |
| <i>ULBP3</i>    | low     | 1.04   | <b>0.2641237</b>  | 94  | 99 <b>193</b>  |
| <i>SDF2</i>     | N/A     | N/A    | <b>0.2541</b>     | 51  | 83 <b>134</b>  |
| <i>MTOR</i>     | N/A     | N/A    | <b>0.2041</b>     | 15  | 19 <b>34</b>   |
| <i>BMP5</i>     | N/A     | N/A    | <b>0.1665588</b>  | 45  | 8 <b>53</b>    |
| <i>WDR1</i>     | N/A     | N/A    | <b>0.0897</b>     | 43  | 104 <b>147</b> |
| <i>ARHGEF17</i> | N/A     | N/A    | <b>0.072</b>      | 6   | 90 <b>96</b>   |
| <i>INTS4</i>    | N/A     | N/A    | <b>0.0004</b>     | 96  | 57 <b>153</b>  |
| <i>KIAA0247</i> | N/A     | N/A    | <b>-0.135</b>     | 26  | 75 <b>101</b>  |
| <i>CCDC114</i>  | neutral | -0.345 | <b>-0.2209571</b> | 31  | 34 <b>65</b>   |
| <i>POLRMT</i>   | neutral | 0.345  | <b>-0.4384961</b> | 38  | 91 <b>129</b>  |
| <i>ZNF829</i>   | N/A     | N/A    | <b>-0.5878</b>    | 65  | 41 <b>106</b>  |
| <i>IL25</i>     | N/A     | N/A    | <b>-0.737</b>     | 85  | 23 <b>108</b>  |
| <i>ITIH5</i>    | N/A     | N/A    | <b>-0.864</b>     | 32  | 10 <b>42</b>   |

---
