# Supplementary material
Source: PubMed Central journal article supplement (PMC3570587)
Supplement: NIHMS420466-supplement-439_2012_1249_MOESM3_ESM.pdf [file NIHMS420466-supplement-439_2012_1249_MOESM3_ESM.pdf]

**Table S3. Forty functional Indels in CDH proband**

| GeneSymbol      | Gene ID | Chromosome | Position  | Ref    | Alt   | Novel       | SIFT       | Phast Cons | Mutation Taster | Endeavour |      | ToppGene Rank | Total Rank |
|-----------------|---------|------------|-----------|--------|-------|-------------|------------|------------|-----------------|-----------|------|---------------|------------|
|                 |         |            |           |        |       |             |            |            |                 | NMD Rank  | Rank |               |            |
| <i>AARS2</i>    | 57505   | 6          | 44269192  | TC     | T     | TRUE        | frameshift | 0.932      | FRAMESHIFT      | 1         | 53   | 43            | <b>96</b>  |
| <i>ACADVL</i>   | 37      | 17         | 7123231   | G      | GT    | TRUE        | utr-5      | 0.001      | FRAMESHIFT      | 1         | 17   | 24            | <b>41</b>  |
| <i>ADAMTS18</i> | 170692  | 16         | 77334227  | T      | TG    | TRUE        | frameshift | 0.004      | FRAMESHIFT      | 1         | 10   | 20            | <b>30</b>  |
| <i>AGAP3</i>    | 116988  | 7          | 150831565 | C      | CG    | TRUE        | frameshift | 1          | FRAMESHIFT      | 1         | 23   | 77            | <b>100</b> |
| <i>ANLN</i>     | 54443   | 7          | 36445855  | AG     | A     | TRUE        | frameshift | 0.022      | FRAMESHIFT      | 1         | 83   | 82            | <b>165</b> |
| <i>AQP7</i>     | 364     | 9          | 33395134  | A      | ACC   | TRUE        | frameshift | 0.053      | FRAMESHIFT      | 1         | 80   | 105           | <b>185</b> |
| <i>BZRAP1</i>   | 9256    | 17         | 56386385  | T      | TTG   | TRUE        | frameshift | 0.673      | FRAMESHIFT      | 1         | 14   | 81            | <b>95</b>  |
| <i>C14orf21</i> | 161424  | 14         | 24769875  | AT     | A     | TRUE        | frameshift | 0.002      | FRAMESHIFT      | 1         | 67   | 67            | <b>134</b> |
| <i>C14orf21</i> | 161424  | 14         | 24769878  | GAA    | G     | TRUE        | frameshift | 0.002      | FRAMESHIFT      | 1         | 67   | 67            | <b>134</b> |
| <i>CPNE1</i>    | 8904    | 20         | 34215237  | A      | AC    | TRUE        | frameshift | 1          | FRAMESHIFT      | 1         | 29   | 86            | <b>115</b> |
| <i>DIAPH1</i>   | 1729    | 5          | 140907260 | AG     | A     | TRUE        | frameshift | 1          | FRAMESHIFT      | 1         | 5    | 94            | <b>99</b>  |
| <i>DNAH5</i>    | 1767    | 5          | 13886234  | AG     | A     | TRUE        | frameshift | 1          | FRAMESHIFT      | 1         | 18   | 52            | <b>70</b>  |
| <i>FAM135B</i>  | 51059   | 8          | 139165269 | A      | AC    | TRUE        | frameshift | 0          | FRAMESHIFT      | 1         | 104  | 72            | <b>176</b> |
| <i>FMN2</i>     | 56776   | 1          | 240370629 | C      | CG    | TRUE        | frameshift | 1          | FRAMESHIFT      | 1         | 58   | 21            | <b>79</b>  |
| <i>GPX7</i>     | 2882    | 1          | 53072454  | T      | TC    | TRUE        | frameshift | 0.984      | FRAMESHIFT      | 1         | 2    | 25            | <b>27</b>  |
| <i>HIVEP3</i>   | 59269   | 1          | 42045727  | GCTGGT | G     | TRUE        | frameshift | 1          | FRAMESHIFT      | 1         | 56   | 65            | <b>121</b> |
|                 |         |            |           |        | GAGGT |             |            |            |                 |           |      |               |            |
| <i>HIVEP3</i>   | 59269   | 1          | 42045767  | G      | GCCA  | TRUE        | frameshift | 1          | FRAMESHIFT      | 1         | 56   | 65            | <b>121</b> |
| <i>HLA-DQB1</i> | 3120    | 6          | 32632649  | C      | CT    | TRUE        | frameshift | 0.001      | FRAMESHIFT      | 1         | 72   | 15            | <b>87</b>  |
| <i>HLA-DRB1</i> | 3123    | 6          | 32552056  | AC     | A     | TRUE        | frameshift | 0          | FRAMESHIFT      | 1         | 63   | 103           | <b>166</b> |
|                 |         |            |           |        | GTGCT |             |            |            |                 |           |      |               |            |
|                 |         |            |           |        | TGGAG |             |            |            |                 |           |      |               |            |
|                 |         |            |           |        | CTCCA |             |            |            |                 |           |      |               |            |
| <i>LAPTM4B</i>  | 55353   | 8          | 98787930  | G      | GCAGC | TRUE        | utr-5      | 0          | FRAMESHIFT      | 1         | 73   | 28            | <b>101</b> |
| <i>LRRC49</i>   | 54839   | 15         | 71276484  | CA     | C     | TRUE        | frameshift | 0.946      | FRAMESHIFT      | 1         | 48   | 62            | <b>110</b> |
| <i>NAALADL2</i> | 254827  | 3          | 175189446 | AG     | A     | TRUE        | frameshift | 0.976      | FRAMESHIFT      | 1         | 100  | 79            | <b>179</b> |
| <i>NUP54</i>    | 53371   | 4          | 77065320  | G      | GT    | TRUE        | frameshift | 1          | FRAMESHIFT      | 1         | 36   | 96            | <b>132</b> |
| <i>PDE4DIP</i>  | 9659    | 1          | 144923728 | GT     | G     | TRUE        | frameshift | 1          | FRAMESHIFT      | 1         | 68   | 6             | <b>74</b>  |
| <i>PDE5A</i>    | 8654    | 4          | 120528327 | G      | GA    | TRUE        | frameshift | 0.015      | FRAMESHIFT      | 1         | 57   | 30            | <b>87</b>  |
| <i>PKD1L2</i>   | 114780  | 16         | 81242148  | GTT    | G     | rs150289691 | frameshift | 1          | FRAMESHIFT      | 1         | 79   | 63            | <b>142</b> |
| <i>PLD2</i>     | 5338    | 17         | 4718774   | G      | GA    | TRUE        | frameshift | 1          | FRAMESHIFT      | 1         | 27   | 12            | <b>39</b>  |
| <i>PTGR1</i>    | 22949   | 9          | 114355255 | CT     | C     | TRUE        | frameshift | 0          | FRAMESHIFT      | 1         | 54   | 16            | <b>70</b>  |
| <i>PTGR1</i>    | 22949   | 9          | 114355259 | CA     | C     | TRUE        | frameshift | 0.003      | FRAMESHIFT      | 1         | 54   | 16            | <b>70</b>  |
| <i>PTGR1</i>    | 22949   | 9          | 114355261 | CT     | C     | TRUE        | frameshift | 0.573      | FRAMESHIFT      | 1         | 54   | 16            | <b>70</b>  |
| <i>RALGPS2</i>  | 55103   | 1          | 178780467 | TAGAG  | T     | TRUE        | frameshift | 1          | FRAMESHIFT      | 1         | 90   | 88            | <b>178</b> |

|                |        |    |           |     |    |             |            |       |            |   |    |                |
|----------------|--------|----|-----------|-----|----|-------------|------------|-------|------------|---|----|----------------|
| <i>SIRPA</i>   | 140885 | 20 | 1895963   | AAC | A  | TRUE        | frameshift | 0.002 | FRAMESHIFT | 1 | 34 | 3 <b>37</b>    |
| <i>SIRPB1</i>  | 10326  | 20 | 1559023   | CCA | C  | TRUE        | frameshift | 0.004 | FRAMESHIFT | 1 | 55 | 4 <b>59</b>    |
| <i>SIRPB1</i>  | 10326  | 20 | 1559028   | TC  | T  | TRUE        | frameshift | 0     | FRAMESHIFT | 1 | 55 | 4 <b>59</b>    |
| <i>STAG2</i>   | 10735  | X  | 123184970 | GC  | G  | TRUE        | frameshift | 1     | FRAMESHIFT | 1 | 30 | 102 <b>132</b> |
| <i>SYT15</i>   | 83849  | 10 | 46965887  | T   | TG | rs112965082 | splice-3   | 0.911 | FRAMESHIFT | 1 | 82 | 48 <b>130</b>  |
| <i>TMPRSS5</i> | 80975  | 11 | 113565278 | G   | GC | TRUE        | frameshift | 0.934 | FRAMESHIFT | 1 | 89 | 60 <b>149</b>  |
| <i>UBAC1</i>   | 10422  | 9  | 138836942 | CCT | C  | TRUE        | frameshift | 0.978 | FRAMESHIFT | 1 | 91 | 70 <b>161</b>  |
| <i>ULK4</i>    | 54986  | 3  | 41996136  | T   | TC | TRUE        | frameshift | 1     | FRAMESHIFT | 1 | 33 | 80 <b>113</b>  |
| <i>ZMIZ2</i>   | 83637  | 7  | 44805118  | G   | GC | TRUE        | frameshift | 0.337 | FRAMESHIFT | 1 | 13 | 92 <b>105</b>  |
